# Supplementary material for: Dependence on Nitrogen Availability and Rhizobial Symbiosis of Different Accessions of Trifolium fragiferum, a Crop Wild Relative Legume Species, as Related to Physiological Traits
Source: MDPI journal article supplement (doi:10.3390/plants11091141), 2022-04-22
Supplement: s1 [file s1]

**Table S1.** Mineral nutrient concentration in different parts of control *Trifolium fragiferum* plants from different accessions.

| Nutrient<br>(unit)          | Plant part    | TF1          | TF2          | TF2b         | TF3          | TF4          | TF5          | TF6          | TF7          | TF8          |
|-----------------------------|---------------|--------------|--------------|--------------|--------------|--------------|--------------|--------------|--------------|--------------|
| P (g kg <sup>-1</sup> DM)   | Leaf blades   | 2.57 ± 0.15  | 2.20 ± 0.06  | 2.93 ± 0.07  | 2.13 ± 0.03  | 2.03 ± 0.20  | 2.90 ± 0.10  | 2.91 ± 0.17  | 2.87 ± 0.02  | 2.87 ± 0.33  |
|                             | Leaf petioles | 2.85 ± 0.03  | 3.55 ± 0.09  | 3.62 ± 0.24  | 2.03 ± 0.09  | 2.00 ± 0.06  | 2.77 ± 0.07  | 3.47 ± 0.37  | 2.45 ± 0.19  | 2.07 ± 0.03  |
|                             | Stolons       | 4.03 ± 0.55  | 3.13 ± 0.29  | 3.16 ± 0.08  | 2.93 ± 0.12  | 2.37 ± 0.15  | 3.57 ± 0.32  | 1.78 ± 0.76  | 3.62 ± 0.04  | 2.63 ± 0.13  |
|                             | Roots         | 2.85 ± 0.03  | 3.50 ± 0.10  | 3.03 ± 0.15  | 3.00 ± 0.46  | 2.50 ± 0.10  | 3.60 ± 0.06  | 3.36 ± 0.05  | 3.63 ± 0.10  | 2.65 ± 0.13  |
| K (g kg <sup>-1</sup> DM)   | Leaf blades   | 11.53 ± 0.86 | 10.37 ± 0.73 | 10.63 ± 0.56 | 15.53 ± 6.02 | 8.83 ± 0.58  | 10.83 ± 0.48 | 12.13 ± 0.29 | 9.77 ± 0.37  | 14.87 ± 5.95 |
|                             | Leaf petioles | 26.30 ± 0.35 | 29.55 ± 0.20 | 25.27 ± 0.42 | 20.20 ± 5.66 | 25.3 ± 1.02  | 24.90 ± 0.75 | 25.93 ± 1.73 | 20.85 ± 1.07 | 23.00 ± 1.63 |
|                             | Stolons       | 17.73 ± 1.28 | 22.60 ± 1.38 | 22.90 ± 1.55 | 18.43 ± 0.80 | 18.3 ± 0.35  | 16.43 ± 0.81 | 21.63 ± 0.84 | 15.73 ± 0.50 | 18.23 ± 2.17 |
|                             | Roots         | 6.50 ± 0.75  | 8.47 ± 0.34  | 10.03 ± 0.77 | 5.85 ± 1.13  | 6.90 ± 0.30  | 8.03 ± 0.74  | 8.47 ± 0.69  | 5.97 ± 0.19  | 9.30 ± 0.51  |
| Ca (g kg <sup>-1</sup> DM)  | Leaf blades   | 30.78 ± 1.38 | 24.73 ± 0.75 | 28.50 ± 3.15 | 28.53 ± 1.91 | 28.70 ± 1.28 | 25.83 ± 0.73 | 24.47 ± 0.42 | 28.53 ± 1.39 | 24.77 ± 2.22 |
|                             | Leaf petioles | 30.75 ± 0.84 | 31.05 ± 1.65 | 24.10 ± 0.44 | 25.90 ± 2.42 | 26.17 ± 0.32 | 29.80 ± 1.12 | 26.43 ± 0.32 | 24.80 ± 1.50 | 26.73 ± 2.35 |
|                             | Stolons       | 4.90 ± 0.44  | 5.60 ± 0.20  | 10.17 ± 1.94 | 6.53 ± 0.41  | 5.30 ± 0.31  | 3.77 ± 0.09  | 5.10 ± 0.60  | 5.60 ± 0.21  | 11.57 ± 0.78 |
|                             | Roots         | 5.55 ± 0.20  | 5.43 ± 0.27  | 7.37 ± 0.22  | 5.40 ± 0.29  | 4.50 ± 0.10  | 4.90 ± 0.47  | 5.20 ± 0.29  | 5.87 ± 0.58  | 4.57 ± 0.32  |
| Mg (g kg <sup>-1</sup> DM)  | Leaf blades   | 4.30 ± 0.20  | 4.63 ± 0.27  | 5.60 ± 0.40  | 4.30 ± 0.20  | 3.70 ± 0.27  | 3.70 ± 0.21  | 3.43 ± 0.03  | 4.63 ± 0.15  | 3.67 ± 0.50  |
|                             | Leaf petioles | 3.90 ± 0.46  | 3.65 ± 0.14  | 3.77 ± 0.58  | 3.00 ± 0.30  | 2.33 ± 0.27  | 3.03 ± 0.12  | 3.93 ± 0.44  | 5.10 ± 0.12  | 1.80 ± 0.21  |
|                             | Stolons       | 1.77 ± 0.32  | 1.80 ± 0.25  | 3.40 ± 0.61  | 1.73 ± 0.35  | 1.10 ± 0.17  | 1.63 ± 0.12  | 1.63 ± 0.03  | 1.60 ± 0.10  | 2.17 ± 0.18  |
|                             | Roots         | 5.10 ± 0.06  | 5.57 ± 0.33  | 10.77 ± 0.29 | 4.95 ± 0.38  | 3.70 ± 0.15  | 5.37 ± 0.52  | 5.10 ± 0.42  | 4.23 ± 0.17  | 3.23 ± 0.39  |
| Zn (mg kg <sup>-1</sup> DM) | Leaf blades   | 63.9 ± 1.3   | 104.8 ± 2.8  | 145.9 ± 9.0  | 75.1 ± 4.7   | 55.7 ± 1.8   | 70.9 ± 5.2   | 67.9 ± 5.3   | 74.6 ± 10.1  | 40.7 ± 5.0   |
|                             | Leaf petioles | 22.7 ± 0.4   | 46.9 ± 0.1   | 30.7 ± 1.7   | 42.3 ± 12.7  | 23.9 ± 1.2   | 24.2 ± 0.8   | 29.8 ± 1.5   | 25.6 ± 0.7   | 22.7 ± 0.8   |
|                             | Stolons       | 19.3 ± 0.6   | 50.7 ± 3.1   | 23.6 ± 0.2   | 30.2 ± 2.2   | 17.5 ± 0.7   | 21.1 ± 1.8   | 22.0 ± 0.9   | 25.3 ± 1.5   | 19.9 ± 1.4   |
|                             | Roots         | 47.0 ± 0.7   | 66.5 ± 1.7   | 51.9 ± 4.6   | 55.4 ± 2.2   | 40.1 ± 2.0   | 47.5 ± 5.1   | 48.7 ± 3.6   | 46.8 ± 2.4   | 37.3 ± 7.5   |
| Fe (mg kg <sup>-1</sup> DM) | Leaf blades   | 88.3 ± 9.3   | 119.8 ± 3.8  | 105.9 ± 7.8  | 69.3 ± 11.1  | 52.4 ± 3.1   | 53.0 ± 3.6   | 63.5 ± 9.7   | 51.3 ± 1.7   | 58.0 ± 9.5   |
|                             | Leaf petioles | 49.7 ± 2.1   | 58.8 ± 0.3   | 62.2 ± 2.5   | 55.6 ± 8.3   | 31.9 ± 1.3   | 51.6 ± 14.6  | 46.5 ± 0.5   | 35.8 ± 0.6   | 36.2 ± 13.3  |
|                             | Stolons       | 38.8 ± 3.9   | 61.2 ± 4.8   | 49.2 ± 4.7   | 55.8 ± 6.4   | 23.1 ± 1.1   | 47.5 ± 5.1   | 43.3 ± 1.2   | 42.0 ± 2.7   | 32.1 ± 1.3   |
|                             | Roots         | 94.6 ± 0.2   | 149.8 ± 6.0  | 118.4 ± 2.5  | 137.5 ± 15.5 | 47.6 ± 5.8   | 89.6 ± 5.0   | 86.8 ± 9.2   | 78.6 ± 12.0  | 63.3 ± 5.1   |
| Cu (mg kg <sup>-1</sup> DM) | Leaf blades   | 9.1 ± 0.4    | 7.5 ± 0.4    | 8.4 ± 0.4    | 6.3 ± 0.6    | 6.2 ± 0.2    | 10.2 ± 1.1   | 7.2 ± 0.5    | 8.3 ± 0.3    | 8.7 ± 0.6    |
|                             | Leaf petioles | 7.4 ± 0.1    | 7.2 ± 0.2    | 8.0 ± 0.4    | 5.3 ± 0.3    | 6.5 ± 0.2    | 10.5 ± 0.8   | 6.0 ± 0.2    | 8.4 ± 0.3    | 6.4 ± 0.5    |
|                             | Stolons       | 9.0 ± 0.4    | 9.8 ± 2.0    | 9.2 ± 0.2    | 8.5 ± 1.0    | 6.2 ± 0.2    | 12.4 ± 0.3   | 6.8 ± 0.3    | 6.8 ± 0.5    | 7.1 ± 0.5    |
|                             | Roots         | 24.1 ± 1.2   | 79.6 ± 14.4  | 122.1 ± 32.2 | 84.1 ± 15.6  | 56.0 ± 0.9   | 97.1 ± 27.5  | 111.9 ± 5.1  | 94.3 ± 1.9   | 56.5 ± 10.9  |
| Mn (mg kg <sup>-1</sup> DM) | Leaf blades   | 71.8 ± 5.2   | 168.1 ± 9.9  | 321.6 ± 29.9 | 238.6 ± 9.8  | 131.9 ± 9.2  | 162.5 ± 9.9  | 187.8 ± 24.4 | 168.5 ± 15.3 | 230.1 ± 45.8 |
|                             | Leaf petioles | 208.8 ± 13.4 | 47.4 ± 3.3   | 63.8 ± 8.1   | 57.4 ± 2.7   | 45.9 ± 6.6   | 53.5 ± 1.1   | 57.5 ± 4.6   | 58.0 ± 0.5   | 54.1 ± 7.5   |
|                             | Stolons       | 55.9 ± 0.4   | 18.9 ± 2.8   | 26.2 ± 1.7   | 29.7 ± 2.5   | 18.1 ± 1.7   | 18.4 ± 2.0   | 19.3 ± 2.1   | 24.3 ± 1.2   | 21.5 ± 2.8   |
|                             | Roots         | 58.6 ± 4.4   | 48.9 ± 4.7   | 58.3 ± 2.5   | 46.8 ± 5.5   | 42.1 ± 2.8   | 41.3 ± 5.9   | 45.7 ± 4.8   | 56.4 ± 2.7   | 45.0 ± 9.0   |

Values are means ± SE from three independently analyzed samples. DM, dry mass.
